# Supplementary material for: Regulatory T Cells Exhibit Interleukin-33-Dependent Migratory Behavior during Skin Barrier Disruption
Source: MDPI journal article supplement (doi:10.3390/ijms22147443), 2021-07-12

# Regulatory T Cells Exhibit Interleukin-33-Dependent Migratory Behavior during Skin Barrier Disruption

Sumika Toyama <sup>1</sup>, Catharina Sagita Moniaga <sup>1</sup>, Susumu Nakae <sup>2</sup>, Masaru Kurosawa <sup>1</sup>,  
Hideoki Ogawa <sup>1</sup>,  
Mitsutoshi Tominaga <sup>1</sup> and Kenji Takamori <sup>1,3,\*</sup>

<sup>1</sup> Juntendo Itch Research Center (JIRC), Institute for Environmental and Gender Specific Medicine,  
Juntendo University Graduate School of Medicine, 2-1-1 Tomioka, Urayasu,  
Chiba 279-0021, Japan;  
su-toyama@juntendo.ac.jp (S.T.); m-catharina@juntendo.ac.jp (C.S.M.);  
mskurosa@juntendo.ac.jp (M.K.); ogawa@juntendo.ac.jp (H.O.);  
tominaga@juntendo.ac.jp (M.T.)

<sup>2</sup> Graduate School of Integrated Sciences for Life, Hiroshima University, 1-4-4  
Kagamiyama,  
Higashi-Hiroshima, Hiroshima 739-8528, Japan; snakae@hiroshima-u.ac.jp

<sup>3</sup> Department of Dermatology, Juntendo University Urayasu Hospital, 2-1-1  
Tomioka, Urayasu,  
Chiba 279-0021, Japan

\* Correspondence: ktakamor@juntendo.ac.jp; Tel.: +81-47-353-3171; Fax: +81-47-353-3178

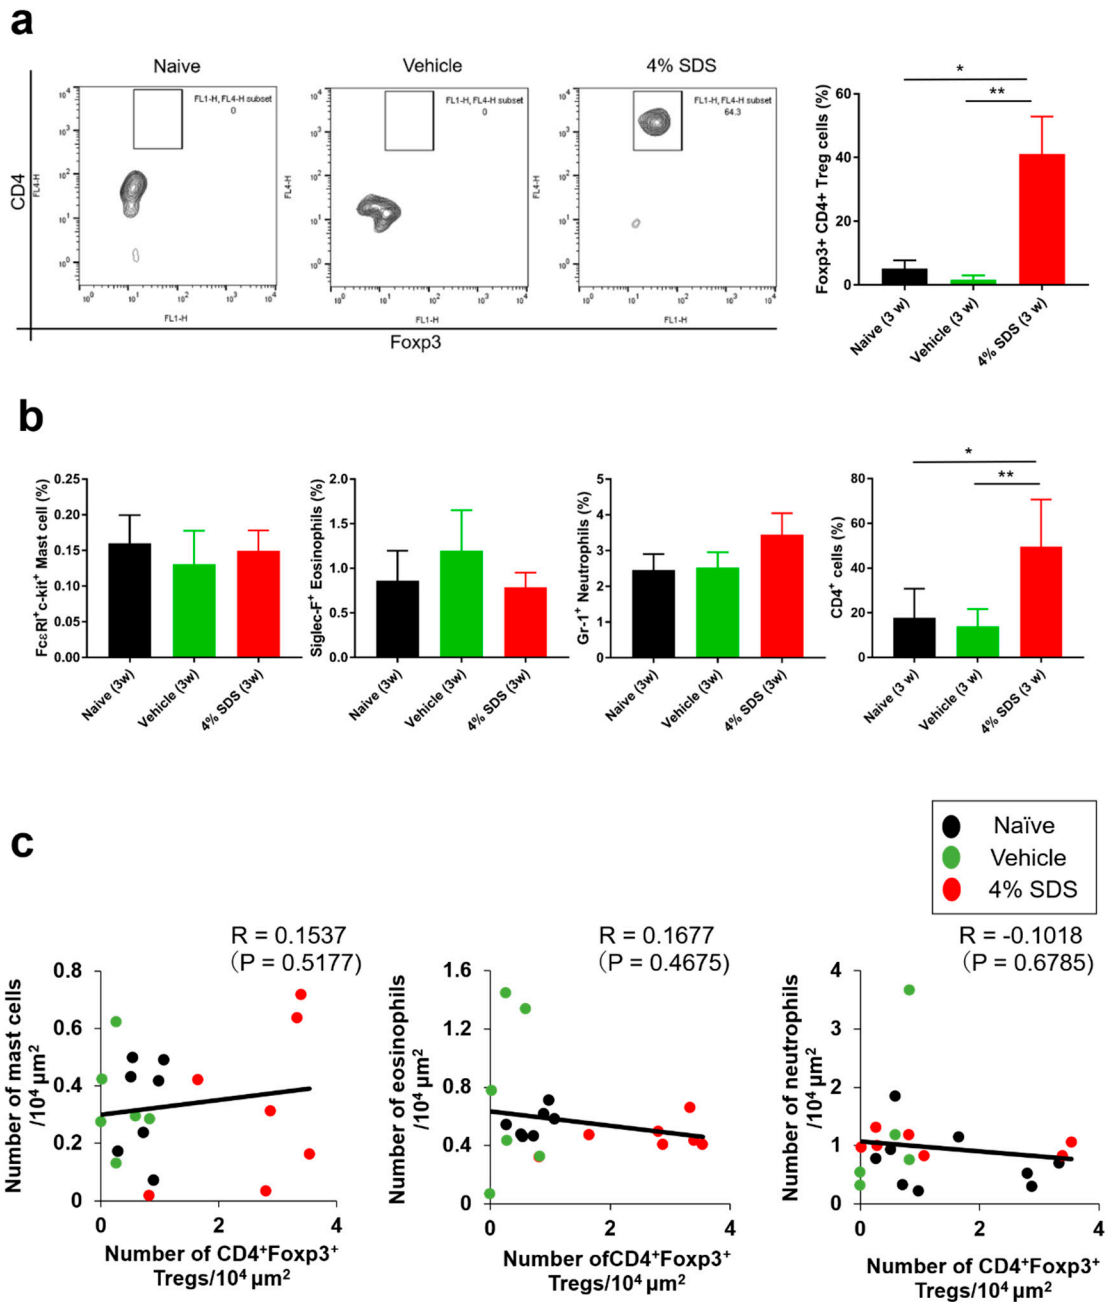

**Supplementary Figure S1. Correlation analyses between Treg infiltration and mast cell, eosinophil and neutrophil infiltration.** a; The proportion of CD4<sup>+</sup>Foxp3<sup>+</sup> Treg cells among CD25<sup>+</sup> cells was assessed by flow cytometry. Data show representative results from 8 mice of naïve, vehicle-treated and 4% SDS-treated skins per experiment and from

at least two independent experiments, each of which gave similar results. b; Percentage of FcεRI<sup>+</sup>c-kit<sup>+</sup> mast cells, Siglec-F<sup>+</sup> eosinophils, Gr-1<sup>+</sup> Neutrophils and CD4<sup>+</sup> cells in the skin. Data show representative results from 8-12 mice of naïve, vehicle-treated and 4% SDS-treated skins per experiment and from at least two independent experiments, each of which gave similar results. \*P<0.05 and \*\* P<0.01 compared with naïve or vehicle-treated mice by the Kruskal-Wallis with Dunn's multiple-comparison test. c; Scatterplots of correlations between Treg number and the number of mast cells, eosinophils or neutrophils; N=21 (Naïve; N=7, Vehicle; N=6, 4% SDS; N=8). Coefficients (r) were determined by Spearman rank correlation tests. P<0.05 indicated significance. Results are shown as the mean ± SEM of two independent experiments.

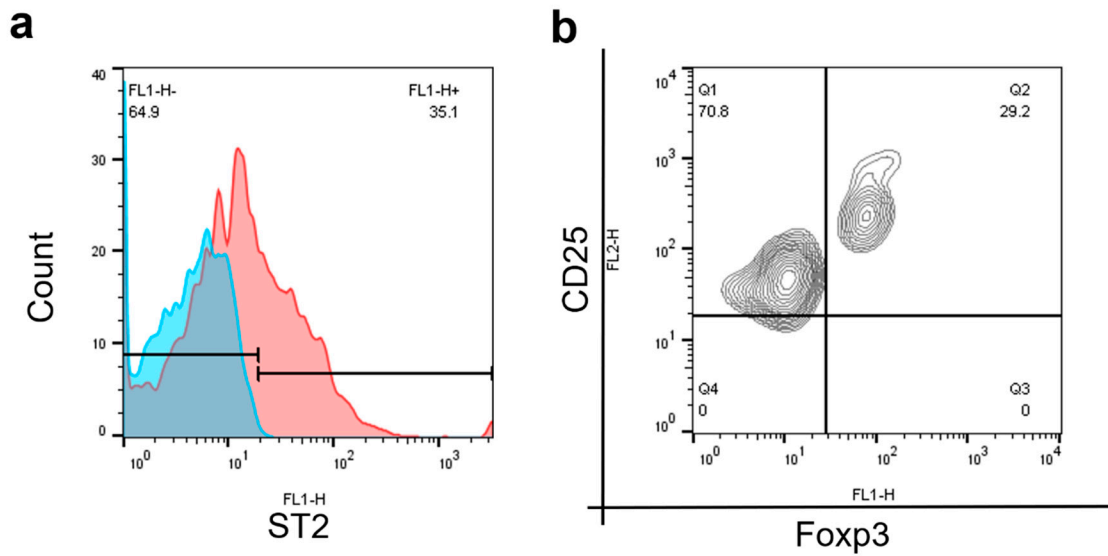

**Supplementary Figure S2. Expression analysis of ST2 or Foxp3 in isolated**

**CD4<sup>+</sup>CD25<sup>+</sup> Tregs.** a; The proportion of ST2<sup>+</sup> Treg cells among CD4<sup>+</sup> CD25<sup>+</sup> T cells was

assessed by flow cytometry. Data show representative results from 4 mice of naïve mice

in spleen per experiment and from at least two independent experiments, each of which

gave similar results. b; The proportion of Foxp3<sup>+</sup> Treg cells among CD4<sup>+</sup> CD25<sup>+</sup> T cells

was assessed by flow cytometry. Data show representative results from 4 mice of naïve

mice in spleen per experiment and from at least two independent experiments, each of

which gave similar results.

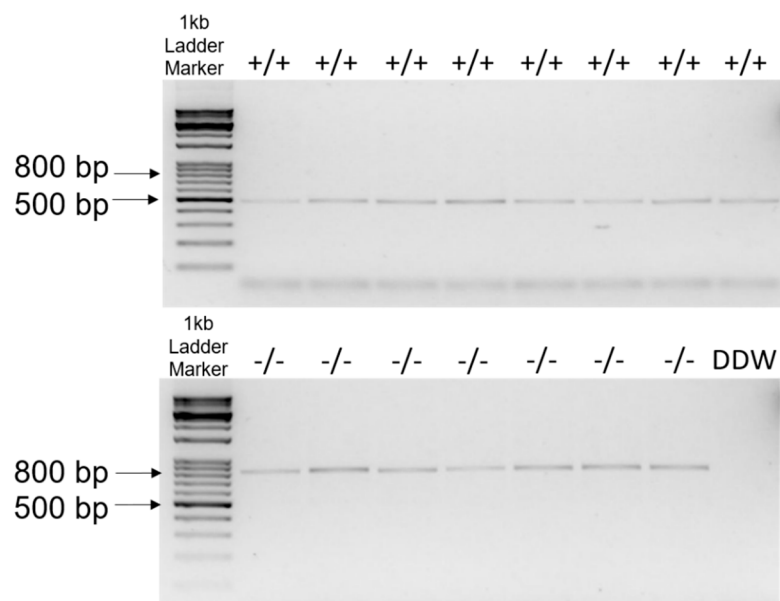

Supplement: s1 [file s1]
